# Supplementary material
Source: Research Square preprint supplement (doi:10.21203/rs.3.rs-9084725/v1)
Supplement: Supplementary file 1 [file 5d7c31a1aa6584f4948d4018.docx]

**Supplementary information**

**The effect of titanium dioxide nanoparticles on the structure and electrochemical properties of a PVDF/PSF composite polymer electrolyte for Li-metal battery**

Gumennyi Igor Vladimirovich*a, Babkin Alexander Vladimirovichb, Govorov Vitaly Alexandrovichc, Malkin Alexander Yakovlevicha, Sergeyev Vladimir Glebovichb

a A.V. Topchiev Institute of Petrochemical Synthesis, Russian Academy of sciences, Russia, 119991, Moscow, 29 Leninsky prospect.

b Department of Chemistry, M.V. Lomonosov Moscow State University Russia, 119991, Moscow, Leninskie Gory.

c National Research University “Moscow Power Engineering Institute”, Russia, 111250, Moscow, Krasnokazarmennaya 17.

*Corresponding email: gumennyy@ips.ac.ru

### **PVDF-PSF Ratio**

The choice of the 80:20 ratio was based on the determination of the ionic conductivity of systems containing varying levels of PSF, ranging from 5% to 20%. As indicated in Figure S1, optimal results were achieved within the concentration range of 15%–20%. Further increases in concentration resulted in decreased conductivity and mechanical properties of the resulting film, which were not within the scope of this study. In all cases presented in the figure S1, the films also contained 10% titanium and 10% salt.

Figure S1. Investigation of the impact of PSF on the ionic conductivity of a polymer film based PVDF

### **Distribution of titanium in polymer films**

|  |  |
| --- | --- |
|  |  |

Figure S2. Quantitative distribution of titanium in polymer films with different dispersants: a, b) film without dispersant; c, d) BYK 185. On the left – spectra along the characteristic radiation line of titanium, on the right – Fourier transform

### **Determination of phase content**

### **FTIR**

The well-established Bouguer-Lambert-Beer equation was employed to determine the composition of each phase within the PVDF matrix:

where the indices , correspond to the phases used for calculation, is the optical density of the phase at a certain band (bands clearly defined by it are set for each phase), is the adsorption coefficients.

To determine the concentration of the β-phase, the equation takes the form:

where and are the optical densities of the -phase and -phase for bands 763 and 840 cm-1, respectively. and are equal to 6.1×104 and 7.7×104 cm2mol-1, respectively.

### **XRD**

The degree of crystallinity () for PVDF powder, film and composite films was calculated using the deconvoluting the XRD profile:

where and are the integrated areas of crystalline peaks and the amorphous halo, respectively. The relative β‑phase content was determined as:

where and are the integrated areas of the α‑ and -phase peaks.
